# Supplementary material
Source: PubMed Central journal article supplement (PMC8781318)

Disclosure Purpose: 21-17995

Summary of Interests

**Company or Organization**

| Entity                                                                                                                                                                                         | Type             | Interest Held By                                                                                                                                                                                                                                                              |
|------------------------------------------------------------------------------------------------------------------------------------------------------------------------------------------------|------------------|-------------------------------------------------------------------------------------------------------------------------------------------------------------------------------------------------------------------------------------------------------------------------------|
| Centers for Disease Control and Prevention                                                                                                                                                     | Grant / Contract | Self                                                                                                                                                                                                                                                                          |
| <i>Recipient Name:</i> Riley Hospital for Children/Indiana University School of Medicine/Trustees of Indiana University<br><i>Grant / Contract Purpose:</i> Other - public health surveillance |                  | <i>Recipient Type:</i> Institution<br><i>Grant / Contract Description:</i><br><i>Additional Information:</i> I received funding from the CDC to Riley Hospital for Children in support of this work and that the funding was specifically for the work described in the paper |

Additional Questions:

- Are there other relationships or activities that readers could perceive to have influenced, or that give the appearance of potentially influencing, what you wrote in the submitted work?**

Yes.

  - Please describe those relationships.**

I received funding from the CDC to Riley Hospital for Children in support of this work and that the funding was specifically for the work described in the paper
- What is the manuscript title?**

Effectiveness of BNT162b2 Vaccine against Critical COVID-19 in Adolescents
- Are you the corresponding author?**

No.

Certification

I certify that the information provided in this disclosure is complete and accurate.

**Disclosure Purpose:** 21-17995

## Summary of Interests

**Company or Organization**

| Entity                                                     | Type             | Interest Held By |
|------------------------------------------------------------|------------------|------------------|
| <a href="#">Centers for Disease Control and Prevention</a> | Grant / Contract | Self             |

*Recipient Name:* Nationwide Children's Hospital  
*Grant / Contract Description:* We receive funding from the CDC to our institution.  
*Additional Information:*

*Recipient Type:* Institution  
*Grant / Contract Purpose:* Research

## Additional Questions:

- Are there other relationships or activities that readers could perceive to have influenced, or that give the appearance of potentially influencing, what you wrote in the submitted work?**  
No.
- What is the manuscript title?**  
Effectiveness of BNT162b2 Vaccine against Critical COVID-19 in Adolescents
- Are you the corresponding author?**  
No.

## Certification

I certify that the information provided in this disclosure is complete and accurate.

**Disclosure Purpose:** 21-17995

## Summary of Interests

| Company or Organization                                                                                                                        |                                                                                                           |                  |
|------------------------------------------------------------------------------------------------------------------------------------------------|-----------------------------------------------------------------------------------------------------------|------------------|
| Entity                                                                                                                                         | Type                                                                                                      | Interest Held By |
| <a href="#">Centers for Disease Control and Prevention</a>                                                                                     | Grant / Contract                                                                                          | Self             |
| <i>Recipient Name:</i> Baylor College of Medicine<br><i>Grant / Contract Description:</i> Patient enrollment<br><i>Additional Information:</i> | <i>Recipient Type:</i> Institution<br><i>Grant / Contract Purpose:</i> Other - public health surveillance |                  |

## Additional Questions:

- Are there other relationships or activities that readers could perceive to have influenced, or that give the appearance of potentially influencing, what you wrote in the submitted work?**  
No.
- What is the manuscript title?**  
Effectiveness of BNT162b2 Vaccine against Critical COVID-19 in Adolescents
- Are you the corresponding author?**  
No.

## Certification

I certify that the information provided in this disclosure is complete and accurate.

**Disclosure Purpose:** 21-17995

### Summary of Interests

I do not have any interests to disclose at this time.

### Additional Questions:

- Are there other relationships or activities that readers could perceive to have influenced, or that give the appearance of potentially influencing, what you wrote in the submitted work?**  
No.
- What is the manuscript title?**  
Effectiveness of BNT162b2 Vaccine against Critical COVID-19 in Adolescents
- Are you the corresponding author?**  
No.

### Certification

I certify that the information provided in this disclosure is complete and accurate.

**Disclosure Purpose:** 21-17995

## Summary of Interests

| Company or Organization                                                                                                                                                                     |                  |                                                                                                           |
|---------------------------------------------------------------------------------------------------------------------------------------------------------------------------------------------|------------------|-----------------------------------------------------------------------------------------------------------|
| Entity                                                                                                                                                                                      | Type             | Interest Held By                                                                                          |
| <a href="#">Centers for Disease Control and Prevention</a>                                                                                                                                  | Grant / Contract | Self                                                                                                      |
| <i>Recipient Name:</i> Rady Children's Hospital/UC San Diego<br><i>Grant / Contract Description:</i> Funding specifically for work described in the paper<br><i>Additional Information:</i> |                  | <i>Recipient Type:</i> Institution<br><i>Grant / Contract Purpose:</i> Other - public health surveillance |

## Additional Questions:

- Are there other relationships or activities that readers could perceive to have influenced, or that give the appearance of potentially influencing, what you wrote in the submitted work?**  
No.
- What is the manuscript title?**  
Effectiveness of BNT162b2 Vaccine against Critical COVID-19 in Adolescents
- Are you the corresponding author?**  
No.

## Certification

I certify that the information provided in this disclosure is complete and accurate.

**Disclosure Purpose:** 21-17995

### Summary of Interests

I do not have any interests to disclose at this time.

### Additional Questions:

- Are there other relationships or activities that readers could perceive to have influenced, or that give the appearance of potentially influencing, what you wrote in the submitted work?**  
No.
- What is the manuscript title?**  
Effectiveness of BNT162b2 Vaccine against Critical COVID-19 in Adolescents
- Are you the corresponding author?**  
No.

### Certification

I certify that the information provided in this disclosure is complete and accurate.

Disclosure Purpose: 21-17995

Summary of Interests

**Company or Organization**

| Entity                                                                                                                                                                                                           | Type             | Interest Held By                                                                                          |
|------------------------------------------------------------------------------------------------------------------------------------------------------------------------------------------------------------------|------------------|-----------------------------------------------------------------------------------------------------------|
| Centers for Disease Control and Prevention                                                                                                                                                                       | Grant / Contract | Self                                                                                                      |
| <i>Recipient Name:</i> University of Miami Miller School of Medicine<br><i>Grant / Contract Description:</i> Miami site contract for the purpose of public health surveillance<br><i>Additional Information:</i> |                  | <i>Recipient Type:</i> Institution<br><i>Grant / Contract Purpose:</i> Other - public health surveillance |

Additional Questions:

- Are there other relationships or activities that readers could perceive to have influenced, or that give the appearance of potentially influencing, what you wrote in the submitted work?**  
No.
- What is the manuscript title?**  
Effectiveness of BNT162b2 Vaccine against Critical COVID-19 in Adolescents
- Are you the corresponding author?**  
No.

Certification

I certify that the information provided in this disclosure is complete and accurate.

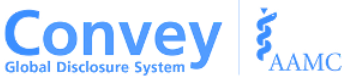

**Disclosure Purpose:** 21-17995

## Summary of Interests

| Company or Organization                                                                                                                                             |                  |                                                                                                           |
|---------------------------------------------------------------------------------------------------------------------------------------------------------------------|------------------|-----------------------------------------------------------------------------------------------------------|
| Entity                                                                                                                                                              | Type             | Interest Held By                                                                                          |
| <a href="#">Centers for Disease Control and Prevention</a>                                                                                                          | Grant / Contract | Self                                                                                                      |
| <i>Recipient Name:</i> Children's Hospital of Philadelphia<br><i>Grant / Contract Description:</i> COVID-19 Vaccine Effectiveness<br><i>Additional Information:</i> |                  | <i>Recipient Type:</i> Institution<br><i>Grant / Contract Purpose:</i> Other - Public health surveillance |

## Additional Questions:

- Are there other relationships or activities that readers could perceive to have influenced, or that give the appearance of potentially influencing, what you wrote in the submitted work?**  
No.
- What is the manuscript title?**  
Effectiveness of BNT162b2 Vaccine against Critical COVID-19 in Adolescents
- Are you the corresponding author?**  
No.

## Certification

I certify that the information provided in this disclosure is complete and accurate.



Disclosure Purpose: 21-17995

Summary of Interests

**Company or Organization**

| Entity                                                                                                                                                                                                                                                                                           | Type             | Interest Held By                                                                |
|--------------------------------------------------------------------------------------------------------------------------------------------------------------------------------------------------------------------------------------------------------------------------------------------------|------------------|---------------------------------------------------------------------------------|
| <b>Centers for Disease Control and Prevention</b>                                                                                                                                                                                                                                                | Grant / Contract | Self                                                                            |
| <i>Recipient Name:</i> University of Nebraska<br><i>Grant / Contract Description:</i> Payment for the work that lead to the paper<br><i>Additional Information:</i>                                                                                                                              |                  | <i>Recipient Type:</i> Institution<br><i>Grant / Contract Purpose:</i> Research |
| <b>NIH Clinical Center</b>                                                                                                                                                                                                                                                                       | Grant / Contract | Self                                                                            |
| <i>Recipient Name:</i> University of Nebraska<br><i>Grant / Contract Description:</i> Subcontract of NIH funding to study influenza<br><i>Additional Information:</i> Given clinical similarities some of the work done for this sub-contract on the grant helped lead to the data in this paper |                  | <i>Recipient Type:</i> Institution<br><i>Grant / Contract Purpose:</i> Research |

Additional Questions:

- Are there other relationships or activities that readers could perceive to have influenced, or that give the appearance of potentially influencing, what you wrote in the submitted work?**  
No.
- What is the manuscript title?**  
Effectiveness of BNT162b2 Vaccine against Critical COVID-19 in Adolescents
- Are you the corresponding author?**  
No.

Certification

I certify that the information provided in this disclosure is complete and accurate.

**Disclosure Purpose:** 21-17995

## Summary of Interests

| Company or Organization                                                                                                                                                                               |                  |                                                                                                                   |
|-------------------------------------------------------------------------------------------------------------------------------------------------------------------------------------------------------|------------------|-------------------------------------------------------------------------------------------------------------------|
| Entity                                                                                                                                                                                                | Type             | Interest Held By                                                                                                  |
| <a href="#">Centers for Disease Control and Prevention</a>                                                                                                                                            | Grant / Contract | Self                                                                                                              |
| <i>Recipient Name:</i> University of California San Francisco<br><i>Grant / Contract Description:</i> A public health study of COVID-19 vaccine effectiveness in preventing severe pediatric COVID-19 |                  | <i>Recipient Type:</i> Institution<br><i>Grant / Contract Purpose:</i> Research<br><i>Additional Information:</i> |

## Additional Questions:

- Are there other relationships or activities that readers could perceive to have influenced, or that give the appearance of potentially influencing, what you wrote in the submitted work?**  
No.
- What is the manuscript title?**  
Effectiveness of BNT162b2 Vaccine against Critical COVID-19 in Adolescents
- Are you the corresponding author?**  
No.

## Certification

I certify that the information provided in this disclosure is complete and accurate.

**Disclosure Purpose:** 21-17995

## Summary of Interests

| Company or Organization                                                |            |                                                                   |
|------------------------------------------------------------------------|------------|-------------------------------------------------------------------|
| Entity                                                                 | Type       | Interest Held By                                                  |
| <a href="#">AerogenPharma</a>                                          | Consultant | Self                                                              |
| <i>Category:</i> Consultant<br><i>Additional Information:</i> Unfunded |            | <i>Description:</i> Scientific consultant for product development |

## Additional Questions:

- Are there other relationships or activities that readers could perceive to have influenced, or that give the appearance of potentially influencing, what you wrote in the submitted work?**  
Yes.
  - Please describe those relationships.**  
My institution received financial compensation for this work from the Center for Disease Control and Prevention.
- What is the manuscript title?**  
Effectiveness of BNT162b2 Vaccine against Critical COVID-19 in Adolescents
- Are you the corresponding author?**  
No.

## Certification

I certify that the information provided in this disclosure is complete and accurate.

**Disclosure Purpose:** 21-17995

## Summary of Interests

| Company or Organization                                                              |                  |                                                              |
|--------------------------------------------------------------------------------------|------------------|--------------------------------------------------------------|
| Entity                                                                               | Type             | Interest Held By                                             |
| <a href="#">Abbott Laboratories</a>                                                  | Stock            | Other - Combined self/spouse account                         |
| <i>Additional Information:</i>                                                       |                  |                                                              |
| <a href="#">Centers for Disease Control and Prevention</a>                           | Grant / Contract | Other - CDC funding to university to cover costs of research |
| <i>Recipient Name:</i> University of Arizona College of Medicine- Tucson             |                  | <i>Recipient Type:</i> Institution                           |
| <i>Grant / Contract Description:</i> Funding for Pediatric Covid-19 related research |                  | <i>Grant / Contract Purpose:</i> Research                    |
| <i>Additional Information:</i>                                                       |                  |                                                              |

## Additional Questions:

- Are there other relationships or activities that readers could perceive to have influenced, or that give the appearance of potentially influencing, what you wrote in the submitted work?**  
No.
- What is the manuscript title?**  
Effectiveness of BNT162b2 Vaccine against Critical COVID-19 in Adolescents
- Are you the corresponding author?**  
No.

## Certification

I certify that the information provided in this disclosure is complete and accurate.

Disclosure Purpose: 21-17995

Summary of Interests

**Company or Organization**

| Entity                                                                                                                         | Type             | Interest Held By                                                                                          |
|--------------------------------------------------------------------------------------------------------------------------------|------------------|-----------------------------------------------------------------------------------------------------------|
| Centers for Disease Control and Prevention                                                                                     | Grant / Contract | Self                                                                                                      |
| <i>Recipient Name:</i> Saint Barnabas Medical Center<br><i>Grant / Contract Description:</i><br><i>Additional Information:</i> |                  | <i>Recipient Type:</i> Institution<br><i>Grant / Contract Purpose:</i> Other - public health surveillance |

Additional Questions:

- Are there other relationships or activities that readers could perceive to have influenced, or that give the appearance of potentially influencing, what you wrote in the submitted work?**  
No.
- What is the manuscript title?**  
Effectiveness of BNT162b2 Vaccine against Critical COVID-19 in Adolescents
- Are you the corresponding author?**  
No.

Certification

I certify that the information provided in this disclosure is complete and accurate.

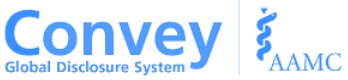

Disclosure Purpose: 21-17995

Summary of Interests

**Company or Organization**

| Entity                                                                                                                                | Type             | Interest Held By                                                                |
|---------------------------------------------------------------------------------------------------------------------------------------|------------------|---------------------------------------------------------------------------------|
| <b>Centers for Disease Control and Prevention</b>                                                                                     | Grant / Contract | Self                                                                            |
| <i>Recipient Name:</i> Vanderbilt University Medical Center<br><i>Grant / Contract Description:</i><br><i>Additional Information:</i> |                  | <i>Recipient Type:</i> Institution<br><i>Grant / Contract Purpose:</i> Research |
| <b>SANOPI PASTEUR INC.</b>                                                                                                            | Grant / Contract | Self                                                                            |
| <i>Recipient Name:</i> Vanderbilt University Medical Center<br><i>Grant / Contract Description:</i><br><i>Additional Information:</i> |                  | <i>Recipient Type:</i> Institution<br><i>Grant / Contract Purpose:</i> Research |

Additional Questions:

- Are there other relationships or activities that readers could perceive to have influenced, or that give the appearance of potentially influencing, what you wrote in the submitted work?**  
Yes.
  - Please describe those relationships.**  
Sanofi Pasteur- received grant funding for an influenza vaccine trial
- What is the manuscript title?**  
Manuscript title: Effectiveness of BNT162b2 Vaccine against Critical COVID-19 in Adolescents Manuscript #: 21-17995
- Are you the corresponding author?**  
No.

Certification

I certify that the information provided in this disclosure is complete and accurate.

Disclosure Purpose: 21-17995

Summary of Interests

**Company or Organization**

| Entity                                                                                                                       | Type             | Interest Held By                                                                                          |
|------------------------------------------------------------------------------------------------------------------------------|------------------|-----------------------------------------------------------------------------------------------------------|
| Centers for Disease Control and Prevention                                                                                   | Grant / Contract | Self                                                                                                      |
| <i>Recipient Name:</i> Central Michigan University<br><i>Grant / Contract Description:</i><br><i>Additional Information:</i> |                  | <i>Recipient Type:</i> Institution<br><i>Grant / Contract Purpose:</i> Other - Public Health Surveillance |

Additional Questions:

- Are there other relationships or activities that readers could perceive to have influenced, or that give the appearance of potentially influencing, what you wrote in the submitted work?**  
No.
- What is the manuscript title?**  
Effectiveness of BNT162b2 Vaccine Against Critical COVID-19 in Adolescents
- Are you the corresponding author?**  
No.

Certification

I certify that the information provided in this disclosure is complete and accurate.



**Disclosure Purpose:** 21-17995

## Summary of Interests

| Entity                                                                                                                                                                                                                                                        | Type             | Interest Held By                                                                                          |
|---------------------------------------------------------------------------------------------------------------------------------------------------------------------------------------------------------------------------------------------------------------|------------------|-----------------------------------------------------------------------------------------------------------|
| <b>BioFire Diagnostics, LLC</b>                                                                                                                                                                                                                               | Consultant       | Self                                                                                                      |
| <i>Category:</i> Consultant<br><i>Additional Information:</i>                                                                                                                                                                                                 |                  | <i>Description:</i> Consultant-lecturer                                                                   |
| <b>Centers for Disease Control and Prevention</b>                                                                                                                                                                                                             | Grant / Contract | Self                                                                                                      |
| <i>Recipient Name:</i> University of Mississippi Medical Center<br><i>Grant / Contract Description:</i><br><i>Additional Information:</i>                                                                                                                     |                  | <i>Recipient Type:</i> Institution<br><i>Grant / Contract Purpose:</i> Other - public health surveillance |
| <b>Dynamed</b>                                                                                                                                                                                                                                                | Other            | Self                                                                                                      |
| <i>Category:</i> Other<br><i>Additional Information:</i> have been working with DYNAMED since 2018, the above refers to renewed contract. DYNAMED is similar to Up to Date, but writers/editors/medical consultants are NOT awarded by content access/viewed. |                  | <i>Description:</i> "triage" of articles that are added for content to Dynamed.com                        |

## Additional Questions:

- Are there other relationships or activities that readers could perceive to have influenced, or that give the appearance of potentially influencing, what you wrote in the submitted work?**  
No.
- What is the manuscript title?**  
Effectiveness of BNT162b2 Vaccine against Critical COVID-19 in Adolescents
- Are you the corresponding author?**  
No.

## Certification

I certify that the information provided in this disclosure is complete and accurate.



Disclosure Purpose: 21-17995

Summary of Interests

**Company or Organization**

| Entity                                                                                                                                                                               | Type             | Interest Held By                                                                |
|--------------------------------------------------------------------------------------------------------------------------------------------------------------------------------------|------------------|---------------------------------------------------------------------------------|
| <a href="#">Centers for Disease Control and Prevention</a>                                                                                                                           | Grant / Contract | Other - Institution                                                             |
| <i>Recipient Name:</i> University of Minnesota<br><i>Grant / Contract Description:</i> Support for Overcoming COVID-19 Vaccine Effectiveness study<br><i>Additional Information:</i> |                  | <i>Recipient Type:</i> Institution<br><i>Grant / Contract Purpose:</i> Research |

Additional Questions:

- Are there other relationships or activities that readers could perceive to have influenced, or that give the appearance of potentially influencing, what you wrote in the submitted work?**  
No.
- What is the manuscript title?**  
Effectiveness of BNT162b2 Vaccine against Critical COVID-19 in Adolescents
- Are you the corresponding author?**  
No.

Certification

I certify that the information provided in this disclosure is complete and accurate.

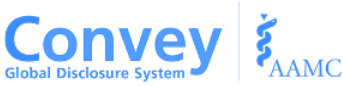

Disclosure Purpose: 21-17995

Summary of Interests

**Company or Organization**

| Entity                                                                                                                                                                         | Type             | Interest Held By                                                                                          |
|--------------------------------------------------------------------------------------------------------------------------------------------------------------------------------|------------------|-----------------------------------------------------------------------------------------------------------|
| Centers for Disease Control and Prevention                                                                                                                                     | Grant / Contract | Self                                                                                                      |
| <i>Recipient Name:</i> Arkansas Children's Research Institute<br><i>Grant / Contract Description:</i> Overcoming COVID<br><i>Additional Information:</i> Institutional Support |                  | <i>Recipient Type:</i> Institution<br><i>Grant / Contract Purpose:</i> Other - Public health surveillance |

Additional Questions:

- Are there other relationships or activities that readers could perceive to have influenced, or that give the appearance of potentially influencing, what you wrote in the submitted work?**  
No.
- What is the manuscript title?**  
Effectiveness of BNT162b2 Vaccine against Critical COVID-19 in Adolescents
- Are you the corresponding author?**  
No.

Certification

I certify that the information provided in this disclosure is complete and accurate.

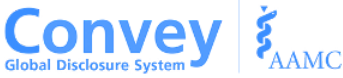

Disclosure Purpose: 21-17995

Summary of Interests

| Company or Organization                                                                                                                                                                |                  |                                                                                                                   |
|----------------------------------------------------------------------------------------------------------------------------------------------------------------------------------------|------------------|-------------------------------------------------------------------------------------------------------------------|
| Entity                                                                                                                                                                                 | Type             | Interest Held By                                                                                                  |
| <b>Centers for Disease Control and Prevention</b>                                                                                                                                      | Grant / Contract | Self                                                                                                              |
| <i>Recipient Name:</i> Emory University<br><i>Grant / Contract Description:</i> Funds specifically for the work described in the current manuscript.<br><i>Additional Information:</i> |                  | <i>Recipient Type:</i> Institution<br><i>Grant / Contract Purpose:</i> Other - public health surveillance         |
| <b>Janssen Pharmaceuticals, Inc</b>                                                                                                                                                    | Grant / Contract | Self                                                                                                              |
| <i>Recipient Name:</i> Emory University<br><i>Grant / Contract Description:</i> Funds from NIH for his work as a co-investigator on clinical trials of Janssen COVID-19 vaccine        |                  | <i>Recipient Type:</i> Institution<br><i>Grant / Contract Purpose:</i> Research<br><i>Additional Information:</i> |
| <b>Moderna</b>                                                                                                                                                                         | Grant / Contract | Self                                                                                                              |
| <i>Recipient Name:</i> Emory University<br><i>Grant / Contract Description:</i> Funds from NIH for his work as a co-investigator on clinical trials of Moderna COVID-19 vaccine        |                  | <i>Recipient Type:</i> Institution<br><i>Grant / Contract Purpose:</i> Research<br><i>Additional Information:</i> |
| <b>Pfizer</b>                                                                                                                                                                          | Grant / Contract | Self                                                                                                              |
| <i>Recipient Name:</i> Emory University<br><i>Grant / Contract Description:</i> Funds from Pfizer for his work as a co-investigator on clinical trials of Pfizer COVID-19 vaccine.     |                  | <i>Recipient Type:</i> Institution<br><i>Grant / Contract Purpose:</i> Research<br><i>Additional Information:</i> |

Additional Questions:

- Are there other relationships or activities that readers could perceive to have influenced, or that give the appearance of potentially influencing, what you wrote in the submitted work?**  
No.
- What is the manuscript title?**  
Effectiveness of BNT162b2 Vaccine against Critical COVID-19 in Adolescents
- Are you the corresponding author?**  
No.

Certification

I certify that the information provided in this disclosure is complete and accurate.

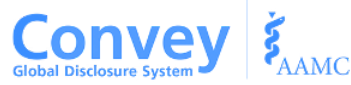

Disclosure Purpose: 21-17995

Summary of Interests

**Company or Organization**

| Entity                                                                                                                               | Type             | Interest Held By                                                                |
|--------------------------------------------------------------------------------------------------------------------------------------|------------------|---------------------------------------------------------------------------------|
| Centers for Disease Control and Prevention                                                                                           | Grant / Contract | Other - Institution                                                             |
| <i>Recipient Name:</i> UAB<br><i>Grant / Contract Description:</i> Funding for conduct of research<br><i>Additional Information:</i> |                  | <i>Recipient Type:</i> Institution<br><i>Grant / Contract Purpose:</i> Research |

Additional Questions:

- Are there other relationships or activities that readers could perceive to have influenced, or that give the appearance of potentially influencing, what you wrote in the submitted work?**  
No.
- What is the manuscript title?**  
Effectiveness of BNT162b2 Vaccine against Critical COVID-19 in Adolescents
- Are you the corresponding author?**  
No.

Certification

I certify that the information provided in this disclosure is complete and accurate.

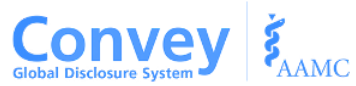

Disclosure Purpose: 21-17995

Summary of Interests

**Company or Organization**

| Entity                                                                                                                         | Type             | Interest Held By                                                                                          |
|--------------------------------------------------------------------------------------------------------------------------------|------------------|-----------------------------------------------------------------------------------------------------------|
| Centers for Disease Control and Prevention                                                                                     | Grant / Contract | Self                                                                                                      |
| <i>Recipient Name:</i> Mayo Clinic<br><i>Grant / Contract Description:</i> 75D30120C07725-01<br><i>Additional Information:</i> |                  | <i>Recipient Type:</i> Institution<br><i>Grant / Contract Purpose:</i> Other - public health surveillance |
| Division of Intramural Research, National Institute of Allergy and Infectious Diseases                                         | Grant / Contract | Self                                                                                                      |
| <i>Recipient Name:</i> Mayo Clinic<br><i>Grant / Contract Description:</i> AI144301-01<br><i>Additional Information:</i>       |                  | <i>Recipient Type:</i> Institution<br><i>Grant / Contract Purpose:</i> Research                           |

Additional Questions:

- Are there other relationships or activities that readers could perceive to have influenced, or that give the appearance of potentially influencing, what you wrote in the submitted work?  
No.
- What is the manuscript title?  
Effectiveness of BNT162b2 Vaccine against Critical COVID-19 in Adolescents
- Are you the corresponding author?  
No.

Certification

I certify that the information provided in this disclosure is complete and accurate.

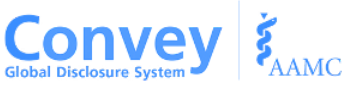

Disclosure Purpose: 21-17995

Summary of Interests

**Company or Organization**

| Entity                                      | Type             | Interest Held By                              |
|---------------------------------------------|------------------|-----------------------------------------------|
| Centers for Disease Control and Prevention  | Grant / Contract | Other - Principal Investigator received funds |
| <i>Recipient Name:</i> Cindy Darnell Bowens |                  | <i>Recipient Type:</i>                        |
| <i>Grant / Contract Description:</i>        |                  | <i>Grant / Contract Purpose:</i>              |
| <i>Additional Information:</i>              |                  |                                               |

Additional Questions:

- Are there other relationships or activities that readers could perceive to have influenced, or that give the appearance of potentially influencing, what you wrote in the submitted work?**  
No.
- What is the manuscript title?**  
Effectiveness of BNT162b2 Vaccine against Critical COVID-19 in Adolescents
- Are you the corresponding author?**  
No.

Certification

I certify that the information provided in this disclosure is complete and accurate.

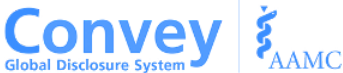

**Disclosure Purpose:** 21-17995

Summary of Interests

**Company or Organization**

| Entity                                                                                                                                                                                                                                                    | Type             | Interest Held By                                                                |
|-----------------------------------------------------------------------------------------------------------------------------------------------------------------------------------------------------------------------------------------------------------|------------------|---------------------------------------------------------------------------------|
| Centers for Disease Control and Prevention                                                                                                                                                                                                                | Grant / Contract | Self                                                                            |
| <i>Recipient Name:</i> MUSC<br><i>Grant / Contract Description:</i><br><i>Additional Information:</i> received funding from the CDC to your institution in support of this work and that was the funding specifically for the work described in the paper |                  | <i>Recipient Type:</i> Institution<br><i>Grant / Contract Purpose:</i> Research |

Additional Questions:

- Are there other relationships or activities that readers could perceive to have influenced, or that give the appearance of potentially influencing, what you wrote in the submitted work?**

No.
- What is the manuscript title?**

Effectiveness of BNT162b2 Vaccine against Critical COVID-19 in Adolescents
- Are you the corresponding author?**

No.

Certification

I certify that the information provided in this disclosure is complete and accurate.

Disclosure Purpose: 21-17995

Summary of Interests

**Company or Organization**

| Entity                                                                                                                                                                                                                      | Type             | Interest Held By                                                                |
|-----------------------------------------------------------------------------------------------------------------------------------------------------------------------------------------------------------------------------|------------------|---------------------------------------------------------------------------------|
| Centers for Disease Control and Prevention                                                                                                                                                                                  | Grant / Contract | Self                                                                            |
| <i>Recipient Name:</i> University of Colorado School of Medicine<br><i>Grant / Contract Description:</i><br><i>Additional Information:</i> Funding from the CDC was specifically for the work described in this manuscript. |                  | <i>Recipient Type:</i> Institution<br><i>Grant / Contract Purpose:</i> Research |

Additional Questions:

- Are there other relationships or activities that readers could perceive to have influenced, or that give the appearance of potentially influencing, what you wrote in the submitted work?  
No.
- What is the manuscript title?  
Effectiveness of BNT162b2 Vaccine against Critical COVID-19 in Adolescents
- Are you the corresponding author?  
No.

Certification

I certify that the information provided in this disclosure is complete and accurate.

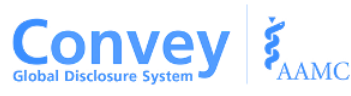



**Disclosure Purpose:** 21-17995

Summary of Interests

I do not have any interests to disclose at this time.

Additional Questions:

- 1. **Are there other relationships or activities that readers could perceive to have influenced, or that give the appearance of potentially influencing, what you wrote in the submitted work?**  
No.
- 2. **What is the manuscript title?**  
Effectiveness of BNT162b2 Vaccine against Critical COVID-19 in Adolescents
- 3. **Are you the corresponding author?**  
No.

Certification

I certify that the information provided in this disclosure is complete and accurate.

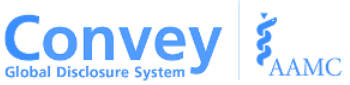

**Disclosure Purpose:** 21-17995

## Summary of Interests

**Company or Organization**

| Entity                                                     | Type             | Interest Held By |
|------------------------------------------------------------|------------------|------------------|
| <a href="#">Centers for Disease Control and Prevention</a> | Grant / Contract | Self             |

*Recipient Name:* Boston Children's Hospital  
*Grant / Contract Description:* Contract from CDC to Boston Children's Hospital coordinating center  
*Additional Information:*

*Recipient Type:* Institution  
*Grant / Contract Purpose:* Research

## Additional Questions:

- Are there other relationships or activities that readers could perceive to have influenced, or that give the appearance of potentially influencing, what you wrote in the submitted work?**  
No.
- What is the manuscript title?**  
Effectiveness of BNT162b2 Vaccine against Critical COVID-19 in Adolescents
- Are you the corresponding author?**  
No.

## Certification

I certify that the information provided in this disclosure is complete and accurate.

Disclosure Purpose: 21-17995

Summary of Interests

| Company or Organization                                                                                                                                                                          |                  |                                                                                 |
|--------------------------------------------------------------------------------------------------------------------------------------------------------------------------------------------------|------------------|---------------------------------------------------------------------------------|
| Entity                                                                                                                                                                                           | Type             | Interest Held By                                                                |
| Centers for Disease Control and Prevention                                                                                                                                                       | Grant / Contract | Self                                                                            |
| <i>Recipient Name:</i> Akron Children's Hospital Research Institute<br><i>Grant / Contract Description:</i> Grant funding for COVID and Influenza Research<br><i>Additional Information:</i>     |                  | <i>Recipient Type:</i> Institution<br><i>Grant / Contract Purpose:</i> Research |
| National Institutes of Health                                                                                                                                                                    | Grant / Contract | Self                                                                            |
| <i>Recipient Name:</i> Akron Children's Hospital Research Institute<br><i>Grant / Contract Description:</i> Research grant for critical illness with influenza<br><i>Additional Information:</i> |                  | <i>Recipient Type:</i> Institution<br><i>Grant / Contract Purpose:</i> Research |

Additional Questions:

- Are there other relationships or activities that readers could perceive to have influenced, or that give the appearance of potentially influencing, what you wrote in the submitted work?  
 Yes.
  - Please describe those relationships.  
 My institution received funding from the CDC in support specifically for the work described in the paper submitted.
- What is the manuscript title?  
 Effectiveness of BNT162b2 Vaccine against Critical COVID-19 in Adolescents
- Are you the corresponding author?  
 No.

Certification

I certify that the information provided in this disclosure is complete and accurate.

**Disclosure Purpose:** 21-17995

**Summary of Interests**

I do not have any interests to disclose at this time.

**Additional Questions:**

- 1. **Are there other relationships or activities that readers could perceive to have influenced, or that give the appearance of potentially influencing, what you wrote in the submitted work?**  
No.
- 2. **What is the manuscript title?**  
Effectiveness of BNT162b2 Vaccine against Critical COVID-19 in Adolescents
- 3. **Are you the corresponding author?**  
No.

**Certification**

I certify that the information provided in this disclosure is complete and accurate.



Disclosure Purpose: 21-17995

## Summary of Interests

### Company or Organization

| Entity                                                                                                                                                                                                               | Type             | Interest Held By                                                                                                  |
|----------------------------------------------------------------------------------------------------------------------------------------------------------------------------------------------------------------------|------------------|-------------------------------------------------------------------------------------------------------------------|
| <a href="#">AstraZeneca</a>                                                                                                                                                                                          | Grant / Contract | Self                                                                                                              |
| <i>Recipient Name:</i> Children's Hospital Los Angeles<br><i>Grant / Contract Description:</i> RSV studies<br><i>Additional Information:</i>                                                                         |                  | <i>Recipient Type:</i> Institution<br><i>Grant / Contract Purpose:</i> Research                                   |
| <a href="#">Centers for Disease Control and Prevention</a>                                                                                                                                                           | Grant / Contract | Self                                                                                                              |
| <i>Recipient Name:</i> Children's Hospital Los Angeles<br><i>Grant / Contract Description:</i> COVID-19 Vaccine Effectiveness Study - Support for work described in the manuscript<br><i>Additional Information:</i> |                  | <i>Recipient Type:</i> Institution<br><i>Grant / Contract Purpose:</i> Research<br><i>Additional Information:</i> |
| <a href="#">National Institutes of Health</a>                                                                                                                                                                        | Grant / Contract | Self                                                                                                              |
| <i>Recipient Name:</i> Children's Hospital Los Angeles<br><i>Grant / Contract Description:</i><br><i>Additional Information:</i>                                                                                     |                  | <i>Recipient Type:</i> Institution<br><i>Grant / Contract Purpose:</i> Research                                   |
| <a href="#">Pfizer</a>                                                                                                                                                                                               | Grant / Contract | Self                                                                                                              |
| <i>Recipient Name:</i> Children's Hospital Los Angeles<br><i>Grant / Contract Description:</i> Pneumococcus studies<br><i>Additional Information:</i>                                                                |                  | <i>Recipient Type:</i> Institution<br><i>Grant / Contract Purpose:</i> Research                                   |
| <a href="#">SANOFI PASTEUR INC.</a>                                                                                                                                                                                  | Consultant       | Self                                                                                                              |
| <i>Category:</i> Consultant<br><i>Additional Information:</i>                                                                                                                                                        |                  | <i>Description:</i>                                                                                               |
| <a href="#">Seqirus USA Inc</a>                                                                                                                                                                                      | Consultant       | Self                                                                                                              |
| <i>Category:</i> Consultant<br><i>Additional Information:</i>                                                                                                                                                        |                  | <i>Description:</i>                                                                                               |

### Additional Questions:

1. **Are there other relationships or activities that readers could perceive to have influenced, or that give the appearance of potentially influencing, what you wrote in the submitted work?**  
No.
2. **What is the manuscript title?**  
Effectiveness of BNT162b2 Vaccine Against Critical COVID-19 in Adolescents
3. **Are you the corresponding author?**  
No.

### Certification

I certify that the information provided in this disclosure is complete and accurate.

**Disclosure Purpose:** 21-17995

### Summary of Interests

I do not have any interests to disclose at this time.

### Additional Questions:

1. **Are there other relationships or activities that readers could perceive to have influenced, or that give the appearance of potentially influencing, what you wrote in the submitted work?**

No.

2. **What is the manuscript title?**

Effectiveness of BNT162b2 Vaccine against Critical COVID-19 in Adolescents

3. **Are you the corresponding author?**

Yes.

a. **Please list the other authors' names here.**

Samantha M. Olson, MPH; Margaret M. Newhams, MPH; Natasha B. Halasa, MD; Ashley M. Price, MPH; Julie A. Boom, MD; Leila C. Sahni, PhD, MPH; Pia S. Pannaraj, MD, MPH; Katherine Irby, MD; Tracie C. Walker, MD; Stephanie P. Schwartz, MD; Aline B. Maddux, MD; Elizabeth H. Mack, MD; Tamara T. Bradford, MD; Jennifer E. Schuster, MD; Ryan A. Nofziger, MD; Melissa A. Cameron, MD; Kathleen Chiotos, MD, MSCE; Melissa L. Cullimore, MD; Shira J. Gertz, MD; Emily R. Levy, MD; Michele Kong, MD; Natalie Z. Cvijanovich, MD; Mary A. Staat, MD; Satoshi Kamidani, MD; Brandon M. Chatani, MD; Samina S. Bhumbra, MD; Katherine E. Bline, MD; Mary G. Gaspers, MD, MPH; Charlotte V. Hobbs, MD; Sabrina M. Heidemann, MD; Mia Maamari, MD; Heidi R. Flori, MD; Janet R. Hume, MD; Matt S. Zinter, MD; Kelly N. Michelson, MD; Laura D. Zambrano, PhD; Angela P. Campbell, MD, MPH; Adrienne G. Randolph, MD;

### Certification

I certify that the information provided in this disclosure is complete and accurate.

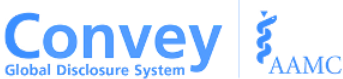

**Disclosure Purpose:** 21-17995

Summary of Interests

I do not have any interests to disclose at this time.

Additional Questions:

- 1. **Are there other relationships or activities that readers could perceive to have influenced, or that give the appearance of potentially influencing, what you wrote in the submitted work?**  
No.
- 2. **What is the manuscript title?**  
Effectiveness of BNT162b2 Vaccine against Critical COVID-19 in Adolescents
- 3. **Are you the corresponding author?**  
No.

Certification

I certify that the information provided in this disclosure is complete and accurate.



Disclosure Purpose: 21-17995

Summary of Interests

**Company or Organization**

| Entity                                                                                                                                                                                            | Type             | Interest Held By                                                                                          |
|---------------------------------------------------------------------------------------------------------------------------------------------------------------------------------------------------|------------------|-----------------------------------------------------------------------------------------------------------|
| Centers for Disease Control and Prevention                                                                                                                                                        | Grant / Contract | Self                                                                                                      |
| <i>Recipient Name:</i> Boston Children's Hospital<br><i>Grant / Contract Description:</i> Contract for investigating COVID-19-related complications in children<br><i>Additional Information:</i> |                  | <i>Recipient Type:</i> Institution<br><i>Grant / Contract Purpose:</i> Other - Public Health Surveillance |

Additional Questions:

- Are there other relationships or activities that readers could perceive to have influenced, or that give the appearance of potentially influencing, what you wrote in the submitted work?**  
No.
- What is the manuscript title?**  
Effectiveness of BNT162b2 Vaccine against Critical COVID-19 in Adolescents
- Are you the corresponding author?**  
No.

Certification

I certify that the information provided in this disclosure is complete and accurate.



Disclosure Purpose: 21-17995

Summary of Interests

**Company or Organization**

| Entity                                                                                                                                                                             | Type             | Interest Held By                                                                                          |
|------------------------------------------------------------------------------------------------------------------------------------------------------------------------------------|------------------|-----------------------------------------------------------------------------------------------------------|
| Centers for Disease Control and Prevention                                                                                                                                         | Grant / Contract | Self                                                                                                      |
| <i>Recipient Name:</i> Baylor College of Medicine<br><i>Grant / Contract Description:</i> Contract for subject enrollment in Overcoming COVID-19<br><i>Additional Information:</i> |                  | <i>Recipient Type:</i> Institution<br><i>Grant / Contract Purpose:</i> Other - Public health surveillance |

Additional Questions:

- Are there other relationships or activities that readers could perceive to have influenced, or that give the appearance of potentially influencing, what you wrote in the submitted work?**  
No.
- What is the manuscript title?**  
Effectiveness of BNT162b2 Vaccine against Critical COVID-19 in Adolescents
- Are you the corresponding author?**  
No.

Certification

I certify that the information provided in this disclosure is complete and accurate.

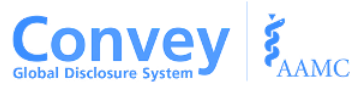

**Disclosure Purpose:** 21-17995

## Summary of Interests

| Entity                                                                                                                                                               | Type             | Interest Held By                                                                |
|----------------------------------------------------------------------------------------------------------------------------------------------------------------------|------------------|---------------------------------------------------------------------------------|
| <b>Centers for Disease Control and Prevention</b>                                                                                                                    | Grant / Contract | Self                                                                            |
| <i>Recipient Name:</i> Children's Mercy Kansas City<br><i>Grant / Contract Description:</i><br><i>Additional Information:</i>                                        |                  | <i>Recipient Type:</i> Institution<br><i>Grant / Contract Purpose:</i> Research |
| <b>Merck</b>                                                                                                                                                         | Grant / Contract | Self                                                                            |
| <i>Recipient Name:</i> Children's Mercy Kansas City<br><i>Grant / Contract Description:</i> RSV monoclonal antibody clinical trial<br><i>Additional Information:</i> |                  | <i>Recipient Type:</i> Institution<br><i>Grant / Contract Purpose:</i> Research |

## Additional Questions:

- Are there other relationships or activities that readers could perceive to have influenced, or that give the appearance of potentially influencing, what you wrote in the submitted work?**  
No.
- What is the manuscript title?**  
Effectiveness of BNT162b2 Vaccine against Critical COVID-19 in Adolescents
- Are you the corresponding author?**  
No.

## Certification

I certify that the information provided in this disclosure is complete and accurate.

Disclosure Purpose: 21-17995

Summary of Interests

**Company or Organization**

| Entity                                                                                                                                                                                                                                                                                  | Type             | Interest Held By                                                                                          |
|-----------------------------------------------------------------------------------------------------------------------------------------------------------------------------------------------------------------------------------------------------------------------------------------|------------------|-----------------------------------------------------------------------------------------------------------|
| Centers for Disease Control and Prevention                                                                                                                                                                                                                                              | Grant / Contract | Self                                                                                                      |
| <i>Recipient Name:</i> University of North Carolina at Chapel Hill<br><i>Grant / Contract Description:</i><br><i>Additional Information:</i> I received funding from the CDC to UNC in support of this work and that was the funding specifically for the work described in this paper. |                  | <i>Recipient Type:</i> Institution<br><i>Grant / Contract Purpose:</i> Other - Public Health Surveillance |

Additional Questions:

- Are there other relationships or activities that readers could perceive to have influenced, or that give the appearance of potentially influencing, what you wrote in the submitted work?**  
No.
- What is the manuscript title?**  
Effectiveness of BNT162b2 Vaccine against Critical COVID-19 in Adolescents
- Are you the corresponding author?**  
No.

Certification

I certify that the information provided in this disclosure is complete and accurate.

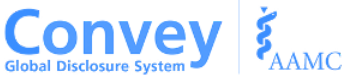

Disclosure Purpose: 21-17995

Summary of Interests

**Company or Organization**

| Entity                                     | Type  | Interest Held By                                                                                                         |
|--------------------------------------------|-------|--------------------------------------------------------------------------------------------------------------------------|
| Centers for Disease Control and Prevention | Other | Self                                                                                                                     |
| <i>Category:</i> Other                     |       | <i>Description:</i> funding was given to my institution, Cincinnati Children's to do the work outlined in the manuscript |
| <i>Additional Information:</i>             |       |                                                                                                                          |

Additional Questions:

- Are there other relationships or activities that readers could perceive to have influenced, or that give the appearance of potentially influencing, what you wrote in the submitted work?**  
No.
- What is the manuscript title?**  
Effectiveness of BNT162b2 Vaccine against Critical COVID-19 in Adolescents
- Are you the corresponding author?**  
No.

Certification

I certify that the information provided in this disclosure is complete and accurate.

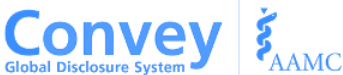

Disclosure Purpose: 21-17995

Summary of Interests

**Company or Organization**

| Entity                                                                                                                        | Type             | Interest Held By                                                                                          |
|-------------------------------------------------------------------------------------------------------------------------------|------------------|-----------------------------------------------------------------------------------------------------------|
| Centers for Disease Control and Prevention                                                                                    | Grant / Contract | Self                                                                                                      |
| <i>Recipient Name:</i> University of North Carolina<br><i>Grant / Contract Description:</i><br><i>Additional Information:</i> |                  | <i>Recipient Type:</i> Institution<br><i>Grant / Contract Purpose:</i> Other - public health surveillance |

Additional Questions:

- Are there other relationships or activities that readers could perceive to have influenced, or that give the appearance of potentially influencing, what you wrote in the submitted work?**  
No.
- What is the manuscript title?**  
Effectiveness of BNT162b2 Vaccine against Critical COVID-19 in Adolescents
- Are you the corresponding author?**  
No.

Certification

I certify that the information provided in this disclosure is complete and accurate.



**Disclosure Purpose:** 21-17995

**Summary of Interests**

I do not have any interests to disclose at this time.

**Additional Questions:**

- Are there other relationships or activities that readers could perceive to have influenced, or that give the appearance of potentially influencing, what you wrote in the submitted work?**  
No.
- What is the manuscript title?**  
Effectiveness of BNT162b2 Vaccine against Critical COVID-19 in Adolescents
- Are you the corresponding author?**  
No.

**Certification**

I certify that the information provided in this disclosure is complete and accurate.

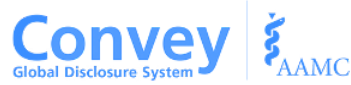

Disclosure Purpose: 21-17995

Summary of Interests

**Company or Organization**

| Entity                                                                                                                                                                                                                         | Type             | Interest Held By                                                                                          |
|--------------------------------------------------------------------------------------------------------------------------------------------------------------------------------------------------------------------------------|------------------|-----------------------------------------------------------------------------------------------------------|
| Centers for Disease Control and Prevention                                                                                                                                                                                     | Grant / Contract | Self                                                                                                      |
| <i>Recipient Name:</i> University of California, San Francisco<br><i>Grant / Contract Description:</i> CDC surveillance of COVID-19<br><i>Additional Information:</i> grant for research/public health surveillance activities |                  | <i>Recipient Type:</i> Institution<br><i>Grant / Contract Purpose:</i> Other - public health surveillance |

Additional Questions:

- Are there other relationships or activities that readers could perceive to have influenced, or that give the appearance of potentially influencing, what you wrote in the submitted work?**  
No.
- What is the manuscript title?**  
Effectiveness of BNT162b2 Vaccine against Critical COVID-19 in Adolescents
- Are you the corresponding author?**  
No.

Certification

I certify that the information provided in this disclosure is complete and accurate.



Supplement: NEJMoa2117995_disclosures.pdf [file NEJMoa2117995_disclosures.pdf]
