# Supplementary material
Source: PubMed Central journal article supplement (PMC8781318)
Supplement: NEJMoa2117995_appendix.pdf [file NEJMoa2117995_appendix.pdf]

## Supplementary Appendix

Supplement to: Olson SM, Newhams MM, Halasa NB, et al. Effectiveness of BNT162b2 vaccine against critical Covid-19 in adolescents. *N Engl J Med*. DOI: 10.1056/NEJMoa2117995

This appendix has been provided by the authors to give readers additional information about the work.

## SUPPLEMENTARY APPENDIX

This appendix has been provided by the authors to give readers additional information about their work.  
Supplement to: Olson S.M., Newhams M.M., Halasa N.B. et al. Effectiveness of BNT162b2 Covid-19  
Vaccine against Critical COVID-19 in Adolescents

### **Table of Contents:**

**Overcoming COVID-19 Study Group Investigators (Pages 2-3)**

**SUPPLEMENTARY METHODS & RESULTS (Pages 4)**

**SUPPLEMENTARY TABLES (Pages 5-8)**

- **Table S1 (Page 5):** Characteristics of suspected hospitalized Multisystem Inflammatory Syndrome in Children (MIS-C) cases aged 12–18 years excluded from the COVID-19 vaccine effectiveness analysis
- **Table S2 (Page 6):** Primary admission diagnosis among 37 hospitalized patients with SARS-CoV-2 positive test who were hospitalized for a non-COVID-19 reason
- **Table S3 (Page 7):** Underlying conditions and vaccination status among COVID-19 case-patients with ECMO or death
- **Table S4 (Page 8):** Supplemental analysis of vaccine effectiveness against any SARS-CoV-2 positive admissions in Overcoming Covid-19 network.

## Overcoming COVID-19 Network Study Group Investigators

### (listed in PubMed, and ordered by U.S. State)

The following study group members were all closely involved with the design, implementation, and oversight of the Overcoming COVID-19 study.

**Alabama:** Children's of Alabama, Birmingham. Michele Kong, MD; Meghan Murdock, RN.

**Arizona:** University of Arizona, Tucson. Mary Glas Gaspers, MD; Katri V. Typpo, MD; Connor P. Kelley, MPH.

**Arkansas:** Arkansas Children's Hospital, Little Rock. Katherine Irby, MD; Ronald C. Sanders, MD; Masson Yates; Chelsea Smith.

**California:** Rady Children's Hospital, San Diego. Melissa A. Cameron, MD; Katheryn Crane, RN.

**California:** UCSF Benioff Children's Hospital Oakland, Oakland. Natalie Z. Cvijanovich, MD; Geraldina Lionetti, MD; Juliana Murcia-Montoya, BS.

**California:** UCSF Benioff Children's Hospital, San Francisco. Matt S. Zinter, MD; Denise Villarreal-Chico, BA.

**California:** Children's Hospital Los Angeles, Los Angeles. Pia S. Pannaraj, MD, MPH; Adam L. Skura, BS; Daniel Hakimi; Harvey Peralta, BA.

**Colorado:** Children's Hospital Colorado, Aurora. Aline B. Maddux, MD, MSCS; Justin M. Lockwood, MD; Emily Port, BA, PMP.

**Florida:** Holtz Children's Hospital, Miami. Brandon M. Chatani, MD.

**Georgia:** Emory University School of Medicine and Children's Healthcare of Atlanta, Atlanta. Satoshi Kamidani, MD; Keiko M. Tarquinio, MD; Laila Hussaini, MPH; Nadine Baida.

**Illinois:** Ann & Robert H. Lurie Children's Hospital of Chicago, Chicago. Kelly N. Michelson, MD, MPH; Bria M. Coates, MD.

**Indiana:** Riley Hospital for Children, Indianapolis. Samina S. Bhumbra, MD; Courtney M. Rowan, MD, MS; Mary Stumpf, MS, CCRC.

**Louisiana:** Children's Hospital of New Orleans, New Orleans. Tamara T. Bradford, MD; Marla S. Johnston, RN, MSN.

**Massachusetts:** Boston Children's Hospital, Boston. Adrienne G. Randolph, MD; Margaret M. Newhams, MPH; Benjamin J. Boutselis; Suden Kucukak, MD; Sabrina R. Chen, BS; Amber O. Orzel, MPH; Edie Weller, PhD; Laura Berbert, MS; Jie He, MS.

**Michigan:** Children's Hospital of Michigan, Detroit. Sabrina M. Heidemann, MD.

**Michigan:** University of Michigan CS Mott Children's Hospital, Ann Arbor. Heidi R. Flori, MD, FAAP.

**Minnesota:** University of Minnesota Masonic Children's Hospital, Minneapolis. Janet R. Hume, MD, PhD; Ellen R. Bruno, MS; Lexie A. Goertzen, BA.

**Minnesota:** Mayo Clinic, Rochester. Emily R. Levy, MD; Supriya Behl, MSc; Noelle M. Drapeau, BA.

**Mississippi:** Children's Hospital of Mississippi, Jackson. Charlotte V. Hobbs, MD; Lora Martin, MSN;

Robert Santos, MD; Lacy Malloch, BS.

**Missouri:** Children's Mercy Hospital, Kansas City. Jennifer E. Schuster, MD; Shannon M. Hill, RN, BSN; Abigail Kietzman, ACRP-CP.

**Nebraska:** Children's Hospital & Medical Center, Omaha. Melissa L. Cullimore, MD, PhD; Valerie Rinehart, MD; Lauren A. Hoody.

**New Jersey:** Saint Barnabas Medical Center, Livingston. Shira J. Gertz, MD.

**North Carolina:** University of North Carolina at Chapel Hill, Chapel Hill. Stephanie P. Schwartz, MD; Tracie C. Walker, MD; Angelo G. Navas; Paris C. Bennett.

**Ohio:** Akron Children's Hospital, Akron. Ryan A. Nofziger, MD; Nicole A. Twinem, RN, ADN; Merry L. Tomcany, RN, BSN.

**Ohio:** Cincinnati Children's Hospital, Cincinnati. Mary Allen Staat, MD, MPH; Chelsea C. Rohlfs, BS, MBA.

**Ohio:** Nationwide Children's Hospital, Columbus. Katherine Bline, MD.

**Pennsylvania:** Children's Hospital of Philadelphia, Philadelphia. Kathleen Chiotos, MD, MSCE; Rebecca L. Douglas, RN, BSN; Kathlyn Phengchomphet, BA.

**South Carolina:** MUSC Children's Health, Charleston. Elizabeth H. Mack, MD, MS; Megan M. Bickford, MS; Lauren E. Wakefield, MHA.

**Tennessee:** Monroe Carell Jr. Children's Hospital at Vanderbilt, Nashville. Natasha B. Halasa, MD, MPH; Janet B. Nicotera, MSN, RN; Meena Golchha, MD.

**Texas:** Texas Children's Hospital, Houston. Julia A. Boom, MD; Leila C. Sahni, PhD, MPH; Jennifer N. Oates, MPH.

**Texas:** University of Texas Southwestern, Children's Medical Center Dallas, Dallas. Mia Maamari, MD; Cindy Bowens, MD, MSCS.

**CDC COVID-19 Response Team on Overcoming COVID-19:** Samantha M. Olson, MPH; Manish M. Patel, MD, MPH; Ashley M. Price, MPH; Laura D. Zambrano, PhD; Angela P. Campbell, MD.

## Supplementary Methods

### *Multisystem inflammatory syndrome in children (MIS-C)*

Cases of MIS-C were excluded from this analysis. Vaccine effectiveness against MIS-C was not evaluated in this for 3 reasons: 1) the limited sample size in the registry during the enrollment period due to the lower incidence in this age group; 2) the time window of risk for MIS is longer after infection (occurring 3-5 weeks after infection) which complicates a retrospective analysis of vaccine effectiveness and requires more time for cases to accumulate; 3) case-definition of MIS-C is broad, and thus cases require adjudication to avoid misclassification. For these reasons, enrollment is still not complete.

Characteristics of MIS-C cases enrolled through October 25, 2021 are presented in **Table S1**.

### *Sample size for vaccine effectiveness*

We estimated that 81 case-patients were needed for computing vaccine effectiveness of 90% with confidence limit width of 30%, with a control to case ratio of 1 to 1 and vaccine coverage of 30%.

Enrollment through October 25<sup>th</sup> with full vaccination coverage of 38% in controls in this report provided sufficient sample size to achieve assessment of vaccine effectiveness against each of the primary outcomes COVID-19 illness requiring hospitalization, ICU admission, or life-threatening interventions (ie, life-support).

**TABLE S1.** Characteristics of suspected hospitalized Multisystem Inflammatory Syndrome in Children (MIS-C) cases aged 12–18 years excluded from the COVID-19 vaccine effectiveness analysis

| <b>Characteristic</b>                                               | <b>MIS-C cases<br/>(N=23)</b> |
|---------------------------------------------------------------------|-------------------------------|
| <b>Age in Years, Median (IQR)</b>                                   | 14 (13-16)                    |
| <b>Age Category, No. (%)</b>                                        |                               |
| 12-15 years                                                         | 19 (82.6)                     |
| 16-18 years                                                         | 4 (17.4)                      |
| <b>Female, No. (%)</b>                                              | 16 (69.6)                     |
| <b>Race/Ethnicity, No. (%)</b>                                      |                               |
| White, non-Hispanic                                                 | 5 (21.7)                      |
| Black, non-Hispanic                                                 | 8 (34.8)                      |
| Hispanic, any race                                                  | 8 (34.8)                      |
| Other, non-Hispanic                                                 | 1 (4.3)                       |
| Unknown                                                             | 1 (4.3)                       |
| <b>U.S. Census Region, No. (%)</b>                                  |                               |
| Northeast                                                           | 2 (8.7)                       |
| Midwest                                                             | 2 (8.7)                       |
| South                                                               | 15 (65.2)                     |
| West                                                                | 4 (17.4)                      |
| <b>Month of admission, No. (%)</b>                                  |                               |
| July                                                                | 0                             |
| August                                                              | 3 (13.0)                      |
| September                                                           | 13 (56.5)                     |
| October                                                             | 7 (30.4)                      |
| <b>Underlying Health Conditions, No. (%)</b>                        |                               |
| At least one underlying condition                                   | 14 (60.9)                     |
| <b>Vaccination status 4 weeks prior to hospitalization, No. (%)</b> |                               |
| Unvaccinated                                                        | 19 (82.6)                     |
| Vaccinated 0-13 Days Prior                                          | 2 (8.7)                       |
| Partially Vaccinated                                                | 1 (4.3)                       |
| Fully Vaccinated                                                    | 1 (4.3)                       |

**TABLE S2.** Primary admission diagnosis among 37 hospitalized patients\* with SARS-CoV-2 positive test who were hospitalized for a non-COVID-19 reason

| <b>Primary reason for admission</b> | <b>N (%)</b> |       |
|-------------------------------------|--------------|-------|
| Psychiatric admission               | 15           | (41%) |
| Trauma                              | 9            | (24%) |
| Shunt malfunction                   | 3            | (8%)  |
| Abscess                             | 1            | (3%)  |
| Cellulitis                          | 1            | (3%)  |
| Cholelithiasis                      | 1            | (3%)  |
| Feeding tube malfunction            | 1            | (3%)  |
| Gynecologic                         | 1            | (3%)  |
| Medication infusion                 | 1            | (3%)  |
| New cancer diagnosis                | 1            | (3%)  |
| Post-operative complication         | 1            | (3%)  |
| Suicidal ideation                   | 1            | (3%)  |
| Trauma                              | 1            | (3%)  |

\*One patient is partially vaccinated and is not represented in vaccine effectiveness against non-COVID-19 hospitalizations (Table S4).

**TABLE S3.** Underlying conditions and vaccination status among COVID-19 case-patients with ECMO or death

| <b>Number</b> | <b>Vaccination status</b> | <b>Underlying conditions</b>                                                                                                                                    |
|---------------|---------------------------|-----------------------------------------------------------------------------------------------------------------------------------------------------------------|
| 1             | Unvaccinated              | Respiratory system disorder, asthma, other chronic condition*                                                                                                   |
| 2             | Unvaccinated              | Respiratory system disorder, asthma, endocrine disorder, Type I diabetes, other chronic condition*                                                              |
| 3             | Unvaccinated              | Respiratory system disorder, asthma, other chronic condition*                                                                                                   |
| 4             | Unvaccinated              | Endocrine disorder, Type II diabetes, other chronic condition*                                                                                                  |
| 5             | Unvaccinated              | Respiratory system disorder and asthma                                                                                                                          |
| 6             | Unvaccinated              | Respiratory system disorder and other chronic condition*                                                                                                        |
| 7             | Unvaccinated              | Disorder of cardiovascular system and other chronic condition*                                                                                                  |
| 8             | Unvaccinated              | Respiratory system disorder and asthma                                                                                                                          |
| 9             | Unvaccinated              | Disorder of cardiovascular system, endocrine disorder, other chronic condition*                                                                                 |
| 10            | Unvaccinated              | Other chronic condition*                                                                                                                                        |
| 11            | Unvaccinated              | Other chronic condition*                                                                                                                                        |
| 12            | Unvaccinated              | Respiratory system disorder, asthma, endocrine disorder                                                                                                         |
| 13            | Unvaccinated              | Respiratory system disorder, Endocrine disorder, Type II Diabetes, other chronic condition*                                                                     |
| 14            | Unvaccinated              | Endocrine disorder, Type I Diabetes                                                                                                                             |
| 15            | Unvaccinated              | Disorder of cardiovascular system, neurologic or neuromuscular disorder, non-oncologic immunosuppressive disorder, endocrine disorder, other chronic condition* |
| 16            | Unvaccinated              | Endocrine disorder, Type II diabetes                                                                                                                            |

\*Other chronic conditions included, but not limited to, obesity, rheumatologic/autoimmune disorder, hematologic disorder, renal or urologic dysfunction, gastrointestinal/hepatic disorder, metabolic or confirmed or suspected genetic disorder, or atopic or allergic condition.



**TABLE S4.** Supplemental analysis of vaccine effectiveness\*<sup>†</sup> (with 95% confidence intervals) against SARS-CoV-2 positive<sup>§</sup> hospitalized patients admitted for non-COVID-19 reasons<sup>§</sup> aged 12–18 years, July–October 25, 2021

|     | No. of vaccinated/Total (%) |                | Vaccine effectiveness (95% CI) |
|-----|-----------------------------|----------------|--------------------------------|
|     | Case-patients               | Controls       |                                |
| All | 5/36 (13.9)                 | 282/723 (39.0) | 78 (48–91)                     |

**Abbreviation:** CI = confidence interval.

\* Vaccine effectiveness estimates were adjusted for U.S. Census region, calendar biweek of admission, continuous age in years, sex, race/ethnicity (non-Hispanic White, non-Hispanic Black, non-Hispanic other, Hispanic of any race, or unknown). Firth penalized regression was used for models with less than 5 vaccinated cases. The widths of the confidence intervals have not been adjusted for multiplicity, so the intervals should not be used to infer vaccine effectiveness against secondary outcomes.

<sup>†</sup> COVID-19 vaccination status included the following two categories: 1) unvaccinated, defined as no receipt of any SARS CoV-2 vaccine before illness onset; 2) fully vaccinated, defined as receipt of both doses of a 2-dose Pfizer-BioNTech vaccination  $\geq 14$  days before illness onset.

<sup>§</sup> Includes participants excluded from the primary analysis who had a SARS-CoV-2 positive test but were hospitalized for non-COVID-19 reasons (n=37) which are outlined in Table S2. One patient is partially vaccinated in Table S3 and is not represented in VE against non-COVID-19 hospitalizations.
